# Supplementary material for: P311 promotes renal fibrosis via TGFβ1/Smad signaling
Source: PubMed Central journal article supplement (PMC4663757; doi:10.1038/srep17032), 2015-11-30
Supplement: srep17032-s1.pdf [file srep17032-s1.pdf]

## **P311 promotes renal fibrosis via TGF $\beta$ 1/Smad signaling**

Zhihui Yao<sup>1,2</sup>, Sisi Yang<sup>1,2</sup>, Weifeng He<sup>1,2</sup>, Lian Li<sup>1,3</sup>, Rui Xu<sup>1</sup>, Xiaorong Zhang<sup>1</sup>,  
Haisheng Li<sup>1</sup>, Rixing Zhan<sup>1</sup>, Wei Sun<sup>1</sup>, Jianglin Tan<sup>1</sup>, Junyi Zhou<sup>1</sup>, Gaoxing  
Luo<sup>1,2\*</sup>, Jun Wu<sup>1,2\*</sup>

<sup>1</sup>Institute of Burn Research, State Key Laboratory of Trauma, Burn and  
Combined Injury, Southwest Hospital, The Third Military Medical University,  
Chongqing 400038, China.

<sup>2</sup>Chongqing Key Laboratory for Disease Proteomics, Chongqing 400038, China.

<sup>3</sup>Department of Nephrology, Southwest Hospital, The Third Military Medical  
University, Chongqing 400038, China.

\*Corresponding author

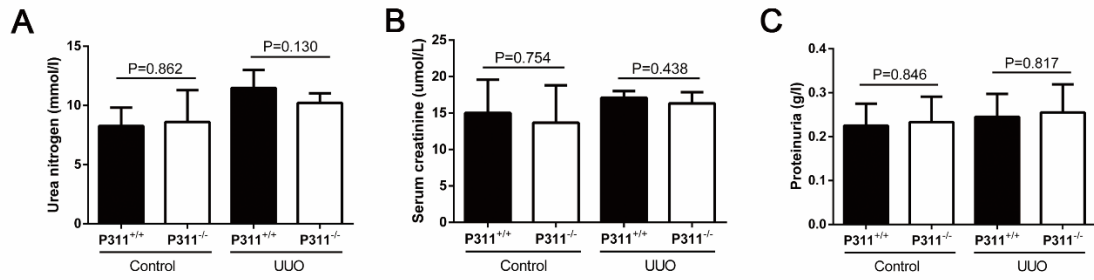

### Supplementary figure 1

Baseline blood and urine data of P311<sup>+/+</sup> and P311<sup>-/-</sup> mice. (A) Urea nitrogen in blood serum of P311<sup>+/+</sup> and P311<sup>-/-</sup> mice (n=4 per group), treated or not treated with unilateral ureteral obstruction (UUO) was analyzed. (B) Serum creatinine in blood serum of P311<sup>+/+</sup> and P311<sup>-/-</sup> mice (n=4 per group), treated or not treated with UUO was analyzed. (C) Proteinuria in urine of P311<sup>+/+</sup> and P311<sup>-/-</sup> mice (n=4 per group), treated or not treated with UUO was analyzed. Data are presented as the mean  $\pm$  SD. \*P<0.05; \*\*P<0.01.

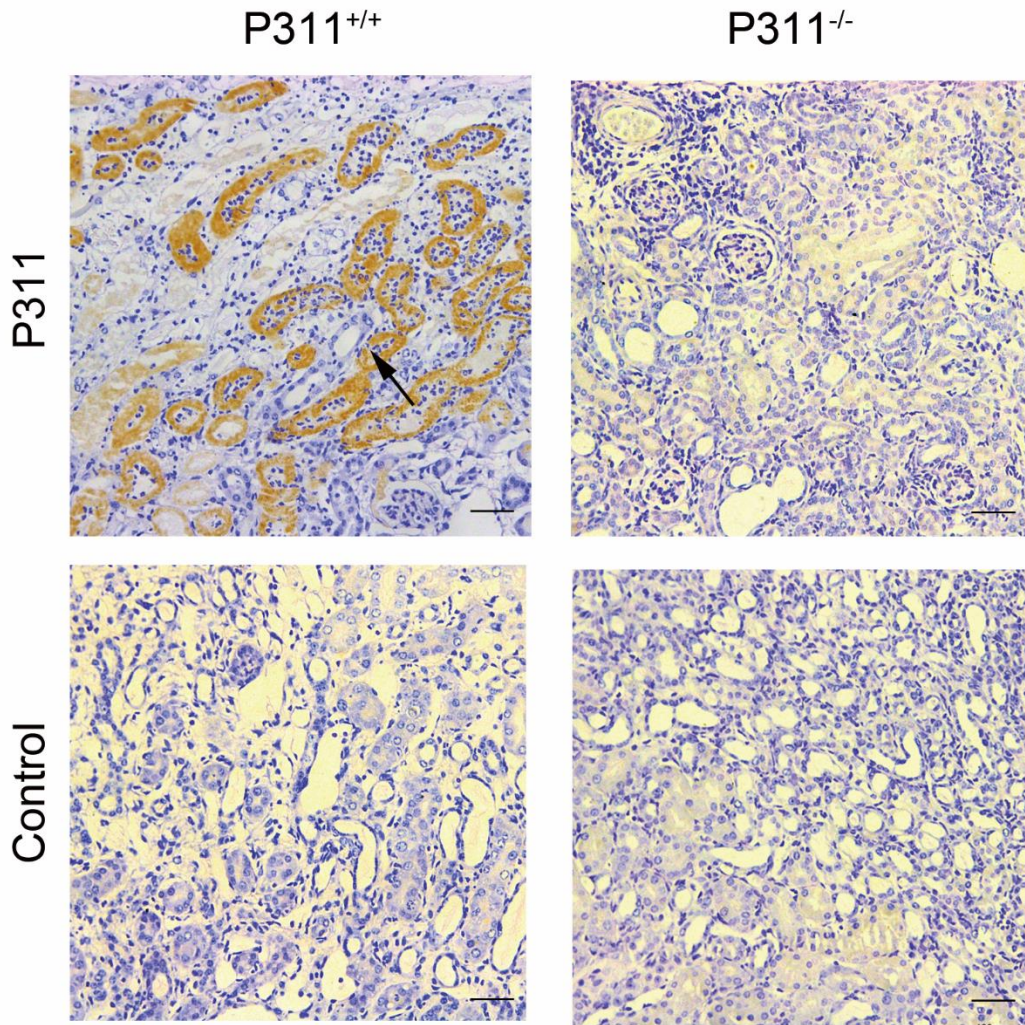

Supplementary figure 2

P311 expression and distribution in kidney tissues from P311<sup>+/+</sup> (n=6) and P311<sup>-/-</sup> (n=6) mice, treated with unilateral ureteral obstruction for 7 days in adult mice, as evidenced by immunohistochemistry. Black arrow indicates the P311-positive region. Bottom panel: negative controls for the immunohistochemical staining of P311 on mouse renal fibrosis samples. Scale bar: 100 $\mu$ m.
